# Supplementary material
Source: publisher figshare collection journal article supplement (https://sage.figshare.com/ndownloader/files/18035486)
Supplement: Supplementary file 1 [file 18035486]

**Utilization of a Standardized Post-Occupancy Evaluation to Assess the Guiding Principles of a Major Academic Medical Center**

**Authors:** Zltizer, Z.; Canar, W.J.; Redemske, D.; Fullam, F.; Lamont, M.;

**Course ID #** HERD74

| Full Name | AIA # / EDAC # | Email | Phone # |
|-----------|----------------|-------|---------|
|           |                |       |         |

**Learning Objective 1:** For the reader to learn about the general history of Evidence Based Design (EBD) and Post Occupancy Evaluations (POE).

**Learning Objective 2:** For the reader to learn about the general limitations of POE's in practice and when to implement them in the design process.

**Learning Objectives 3:** For the reader to learn about the method to develop a similar to pilot internal POE pilot program at a healthcare institutions.

**Learning Objective 4:** For the reader to learn about one of the standardized POE toolkits available and opportunities for improvement with utilizing this toolkit.

**Question 1:** Which of the following is not one of the challenges and draw backs of POEs that have hindered its universal adoption?

- a. Individual architecture firms can have internal versions of POEs that are not shared with the market and not utilized on every project.
- b. The level of customization, which can lead to difficulty in standardization.
- c. Conducting a POE on every project may also be beyond the resources of a firm.
- d. POE's have not shown to be effective in documenting design issues.

**Question 2:** What was the intent of the pilot study?

---

**Question 3:** Which of the following is not one of the limitations of the study?

- a. Reliability and validity of the CHD questionnaire.
- b. The need for a more robust statistical analysis of the survey results.
- c. The development of a more robust training program to help standardize auditing practices.
- d. The need for additional clinical personnel in the audit.

To earn AIA continuing education units please complete form, and email Jill Glaser at [jglaser@healthdesign.org](mailto:jglaser@healthdesign.org) and your credits will be uploaded to your AIA account. To earn EDAC continuing education units please complete the form, retain the form for your records and self-submit the credits at the time of your EDAC renewal. The form is your "proof of attendance."
